# Supplementary material
Source: PubMed Central journal article supplement (PMC5794646)
Supplement: NIHMS896920-supplement-1.pdf [file NIHMS896920-supplement-1.pdf]

SUPPLEMENTARY FIGURE 1

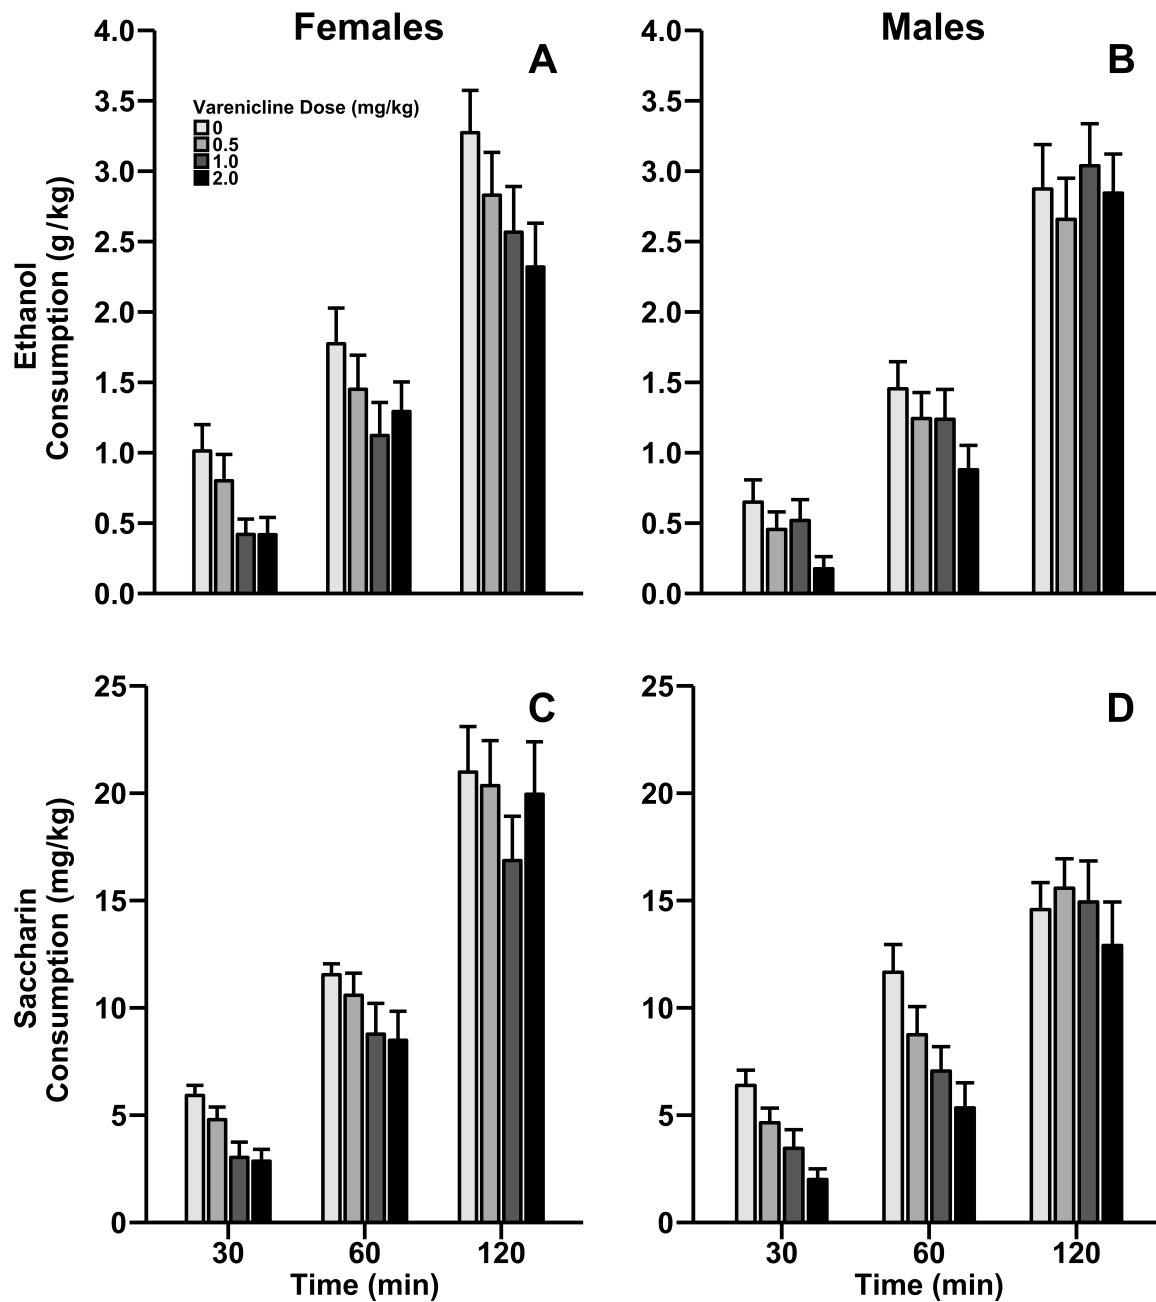

**Supplementary Fig 1. Varenicline decreased binge-like ethanol consumption and saccharin consumption in adolescent male and female C57BL/6J mice.** Data (mean  $\pm$  SEM) represent ethanol consumption in female (A) and male (B) and saccharin consumption in female (C) and male (D) adolescent mice. For ethanol consumption,

there was a main effect of varenicline dose ( $F_{3, 138}=5.5, p<0.01$ ) at 30 minutes. The 2 mg/kg dose of varenicline significantly reduced ethanol consumption compared to saline treatment. This effect was similar in both male and female animals as indicated by no sex X treatment interaction. There was a main effect of sex on saccharin consumption at 120 min such that females consumed more saccharin than males ( $F_{1, 22}=9.3, p<0.01$ ;  $20.0 \pm 2.4, 12.9 \pm 2.0$ , respectively), but this did not interact with treatment. Additionally, varenicline (1 and 2 mg/kg) reduced saccharin consumption as evidenced by a main effect of treatment at 30 ( $F_{3, 66}=15.2, p<0.001$ ) and 60 minutes ( $F_{3, 66}=6.9, p<0.001$ ).  $N = 12$  animal per dose for saccharin consumption and 24 animals per dose for ethanol consumption.
